# Supplementary material for: Molecular Characteristics of Jujube Yellow Mottle-Associated Virus Infecting Jujube (Ziziphus jujuba Mill.) Grown at Aksu in Xinjiang of China
Source: PubMed Central journal article supplement (PMC7823511; doi:10.3390/v13010025), 2020-12-25
Supplement: viruses-13-00025-s001.pdf [file viruses-13-00025-s001.pdf]

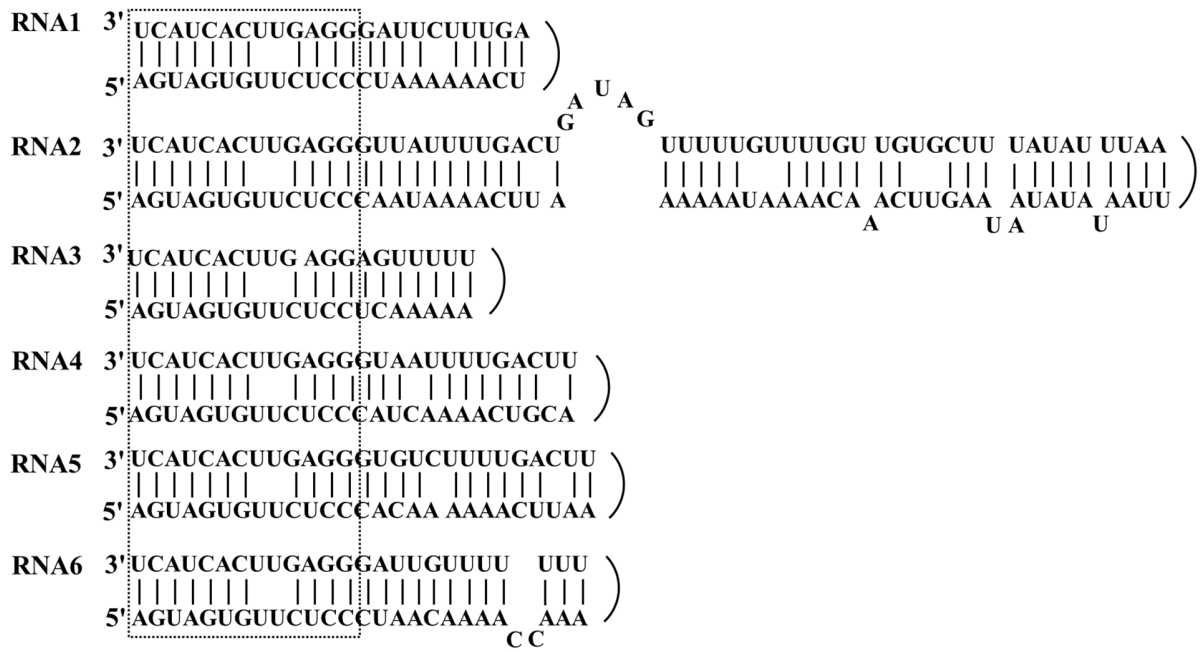

**Figure S1.** Stem-loop structures formed by the conserved nucleotides at 5' and 3' termini of jujube yellow mottle-associated virus (JYMaV) RNAs.

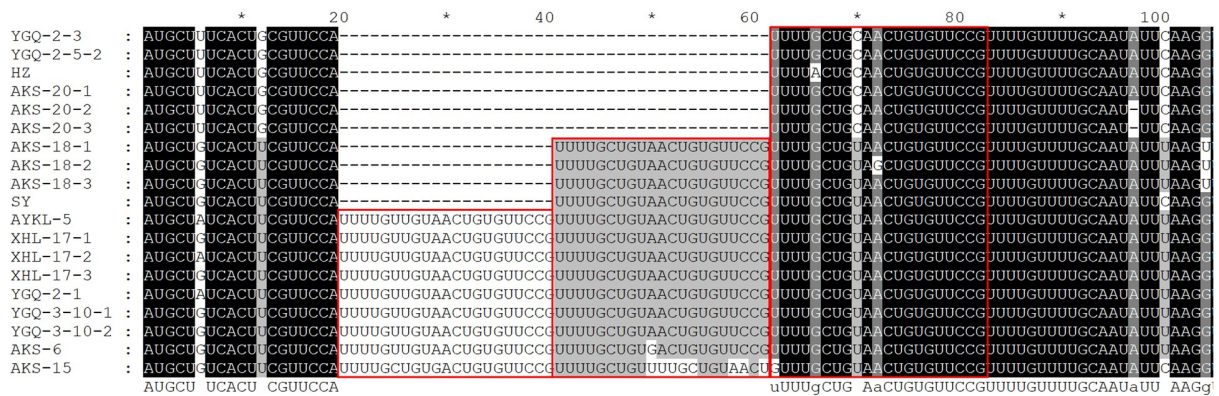

**Figure S2.** Multiple alignment of nucleotides at the 3' un-translation region (3'UTR) of RNA1 sequences of jujube yellow mottle-associated virus (JYMaV) amplified from Aksu jujube samples and the corresponding sequence of a reported isolate SY. The 21-bp repeat sequences were highlighted with red boxes. Each sequence was labeled with a sampling field ID followed with a location number and a clone number.

```

          *      20      *      40      *      60      *
AKS-5 : AACCAUACCAAACUUAACAUA AAAAUG-----AGUAUUUGUAAUACAAUGAA
AKS-6 : AACCAUACCAAACUUAACAUA AAAAUG-----AGUAUUUGUAAUACAAUGAA
AKS-9 : AACCAUACCAAACUUAACAUA AAAAUG-----AGUAUUUGUAAUACAAUGAA
AKS-18 : AACCAUACCAAACUUAACAUA AAAAUG-----AGUAUUUGUAAUACAAUGAA
AKS-20 : AACCAUACCAAACUUAACAUA AAAAUG-----AGUAUUUGUAAUACAAUGAA
AYKL-5 : AACCAUACCAAACUUAACAUA AAAAUG-----AGUAUUUGUAAUACAAUGAA
GS : AACCAUACCAAACUUAACAUA AAAAUG-----AGUAUUUGUAAUACAAUGAA
HZ : AACCAUACCAAACUUAACAUA AAAAUG-----AGUAUUUGUAAUACAAUGAA
XHL-5 : AACCAUACCAAACUUAACAUA AAAAUG-----AGUAUUUGUAAUACAAUGAA
XHL-6-1 : AACCAUACCAAACUUAACAUA AAAAUG-----AGUAUUUGUAAUACAAUGAA
XHL-17-1 : AACCAUACCAAACUUAACAUA AAAAUG-----AGUAUUUGUAAUACAAUGAA
XHL-20 : AACCAUACCAAACUUAACAUA AAAAUG-----AGUAUUGUAAUACAAUGAA
YGQ-2-3 : AACCAUACCAAACUUAACAUA AAAAUG-----AGUAUUUGUAAUACAAUGAA
YGQ-3-7 : AACCAUACCAAACUUAACAUA AAAAUG-----AGUAUUUGUAAUACAAUGAA
SY : AACCAUACCAAACUUAACAUA AAAAUGAGUAUUUGUAAUACAAUGAAGCAUAAAAUAAGUAUUUGUAAUACAAUGAA
      AACCAUACCAAACUUAACAUA AAAAUG      AGUAUuGUAAUACAaUGAA

```

**Figure S3.** Multiple alignments of nucleotides at the 5' UTR of RNA3 sequences of jujube yellow mottle-associated virus (JYMaV) amplified from Aksu jujube samples and the corresponding sequence of a reported isolate SY. Each sequence was labeled with a sampling field ID followed with a location number and a clone number.

```

*          20          *          *          100          *          120
YGQ-2-3-1 : GAGCGAAGAUAAUU-----GUAUCA AUGU?   AUCAUAAG-----UUUUUAU
YGQ-2-3-5 : GAGCGAAGAU GAUU-----GUAUCA AUGU?   AUCAUAAG-----UUUUUAU
YGQ-2-3-6 : GAGCGAAGAU GAUU-----GUAUCA AUGU?   AUCAUAAG-----UUUUUAU
YGQ-2-3-7 : GAGCGAAGAU GAUU-----GUAUCA AUGU?   AUCAUAAG-----UUUUUAU
YGQ-3-7-1 : GAGCGAAGAU GAUU-----GUAUCA AUGU?   AUCAUAAG-----UUUUUAU
YGQ-3-7-2 : GAGCGAAGAU GAUU-----GUAUCA AUGU?   AUCAUAAG-----UUUUUAU
HZ          : GAGCGAAGAU GAUU-----GUAUCA AUGU?   AUCAUAAG-----UUUUUAU
HZ-1       : GAGCGAAGAU GAUU-----GUAUCA AUGU?   AUCAUAAG-----UUUUUAU
HZ-2       : GAGCGAAGAU GAUU-----GUAUCA AUGU?   AUCAUAAG-----UUUUUAU
HZ-3       : GAGCGAAGAU GAUU-----GUAUCA AUGU?   AUCAUAAG-----UUUUUAU
HZ-4       : GAGCGAAGAU GAUU-----GUAUCA AUGU?   AUCAUAAG-----UUUUUAU
AKS-15     : AAGCGAAGACA AUUGAAACUUA GUAUCA AUGU?   AUCAUAAG-----UUUUUAU
SY         : GAGUGAAGAAA AUUGUAGCUUA GUAUGCAUGU?   AUCAUAAGUAUUUUUAUUUUUUUAUUUUUUUAUUUUUAU

          180          *          200          *          220          *
YGQ-2-3-1 : UUUAAUAUUU-----UUAUCUUGAUAAU-----UUAUUGAUCA
YGQ-2-3-5 : UUUAAUAUUU-----UUAUCUUGAUAAU-----UUAUUUAACCA
YGQ-2-3-6 : UUUAAUAUUU-----UUAUCUUGAUAAU-----UUAUUUAACCA
YGQ-2-3-7 : UUUAAUAUUU-----UUAUCUUGAUAAU-----UUAUUUAACCA
YGQ-3-7-1 : UUUAAUAUUU-----UUAUCUUGAUAAU-----UUAUUUAACCA
YGQ-3-7-2 : UUUAAUAUUU-----UUAUCUUGAUAAU-----UUAUUUAACCA
HZ          : UUUAAUAUUU-----UUAUCUUGAUAAU-----UUAUUUAACCA
HZ-1       : UUUAAUAUUU-----UUAUCUUGAUAAU-----UUAUUUAACCA
HZ-2       : UUUAAUAUUU-----UUAUCUUGAUAAU-----UUAUUUAACCA
HZ-3       : UUUAAUAUUU-----UUAUCUUGAUAAU-----UUAUUUAACCA
HZ-4       : UUUAAUAUUU-----UUAUCUUGAUAAU-----UUAUUUAACCA
AKS-15     : UUUAAUAUUU-----UUAUCUUGAUAAU-----UUAUGAUCA
SY         : UUUAAUAUUU-----UUAUCUUGAUAAU-----UUAUGAUCA
          UUUAAUAUUU          UUAUCUUGAUAAU          UUAUUUAACCA

```

**Figure S4.** Multiple alignments of nucleotides at the 5' UTR of RNA4 sequences of jujube yellow mottle-associated virus (JYMaV) amplified from Aksu jujube samples and the corresponding sequence of a reported isolate SY. Each sequence was labeled with a sampling field ID followed with a location number and a clone number.

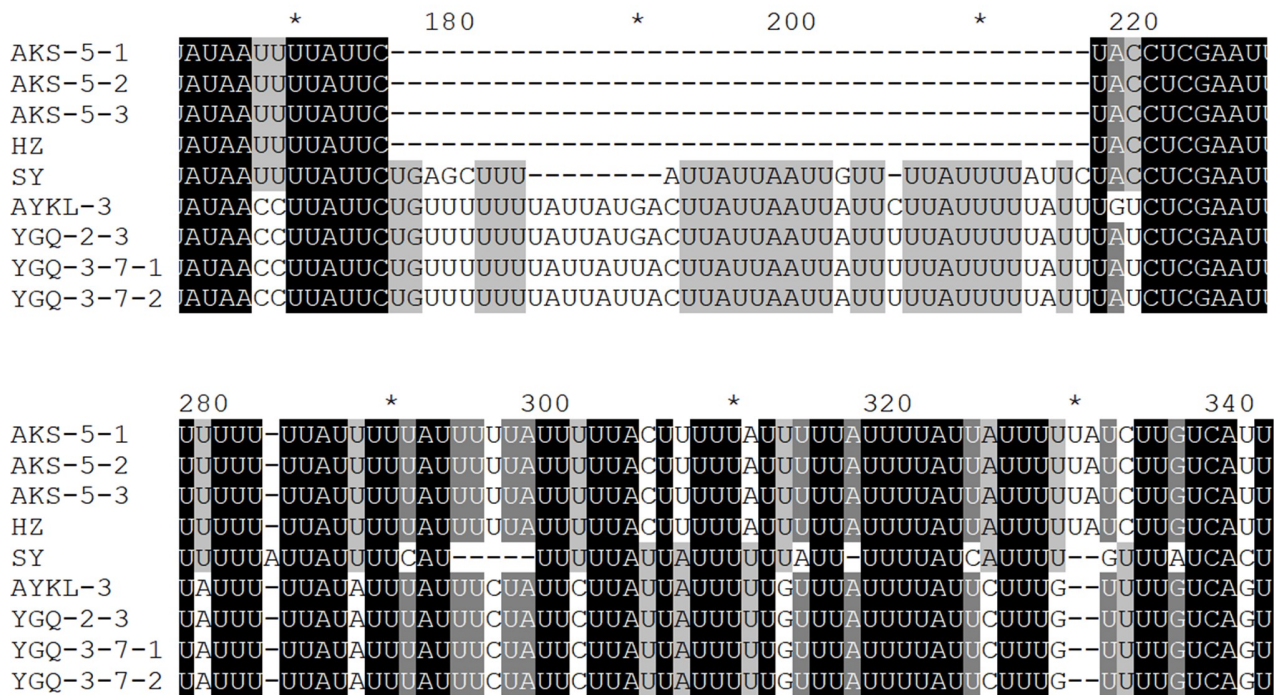

**Figure S5.** Multiple alignments of nucleotides at the 5' UTR of RNA5 sequences of jujube yellow mottle-associated virus (JYMaV) amplified from Aksu jujube samples and the corresponding sequence of a reported isolate SY. Each sequence was labeled with a sampling field ID followed with a location number and a clone number.

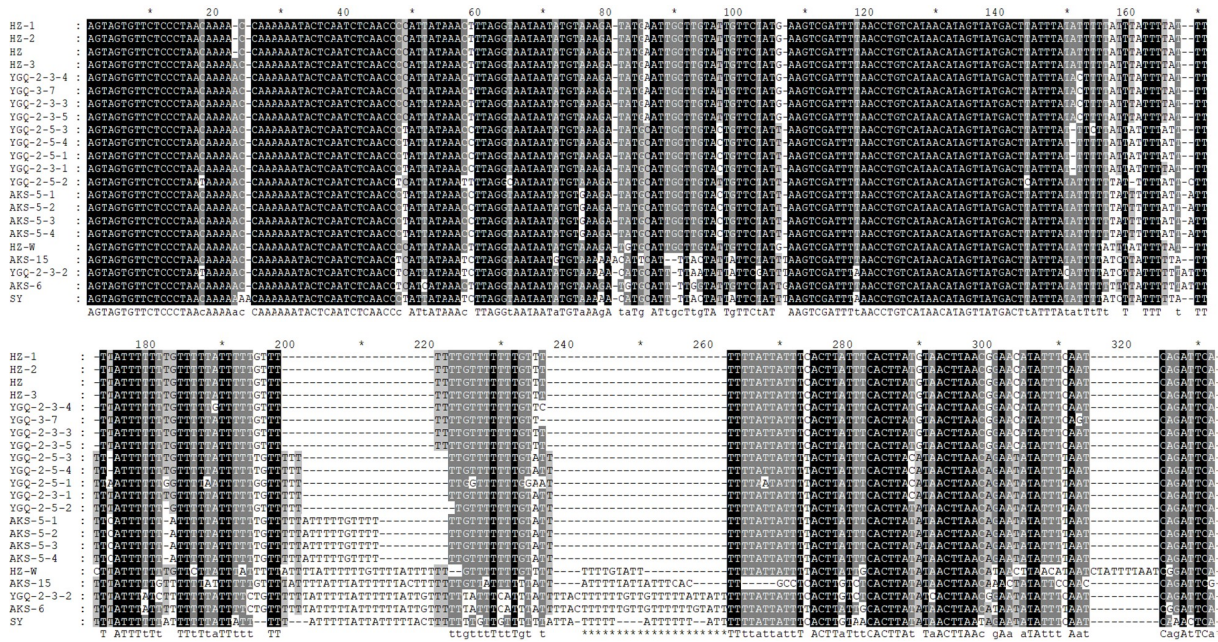

**Figure S6.** Multiple alignments of nucleotides at the 5' UTR of RNA6 sequences of jujube yellow mottle-associated virus (JYMaV) amplified from Aksu jujube samples and the corresponding sequence of a reported isolate SY. Each sequence was labeled with a sampling field ID followed with a location number and a clone number.

**Table S1** Primers designed for amplification of the ORF4 and ORF5 of jujube yellow mottle-associated virus (JYMaV) isolate HZ

| ORF  | Primer | Sequence <sup>a</sup> (5'-3')               | Position<br>(nt) | Product size<br>(bp) |
|------|--------|---------------------------------------------|------------------|----------------------|
| ORF4 | P4-F   | <u>AAAAAGCAGGCTCCATGAAAATATTTCAAGTATATT</u> | 1317-1392        | 1155                 |
|      | P4-R   | <u>AGAAAGCTGGGTC</u> CAATGCTATCTTAGACATATC  | 265-285          |                      |
| ORF5 | P5-F   | <u>AAAAAGCAGGCTCCATGAAAGTTATCAAGGCTTAC</u>  | 1131-1151        | 861                  |
|      | P5-R   | <u>AGAAAGCTGGGTC</u> ATCATTATAATGTATGGAC    | 318-336          |                      |

a: The artificially added nucleotides used for recombination reactions were underlined.

**Table S2.** Contigs derived samples HZ by small RNA sequencing (sRNA-seq) and matched proteins of raspberry leaf blotch virus (RLBV), a member of the genus *Emaravirus* as analyzed against database available in NCBI GenBank

| <b>Matched protein</b> | <b>No. of contig</b> | <b>Length (bp)</b> | <b>aa identity (%)</b> |
|------------------------|----------------------|--------------------|------------------------|
| P1                     | 51                   | 51-287             | 48.4-90.8              |
| P2                     | 12                   | 56-180             | 51.6-70.8              |
| P3                     | 12                   | 56-190             | 59.4-88.2              |
| P4                     | 13                   | 55-350             | 46.8-91.3              |
| P8                     | 1                    | 73                 | 69.2                   |



**Table S3** Contigs derived from samples AKS-6 and AKS-15 by RNA-seq and identity with the genomic RNAs of jujube yellow mottle-associated virus (JYMaV) isolate HZ

| Sample | RNA  | Contig ID  | No. of reads | Size (bp) | Position (nt) | Identity (%) |
|--------|------|------------|--------------|-----------|---------------|--------------|
| AKS-6  | RNA1 | contig_364 | 280980       | 7134      | 31–7160       | 92.2         |
|        | RNA2 | contig_489 | 90265        | 2221      | 1–2221        | 95.9         |
|        | RNA3 | contig_60  | 298358       | 1225      | 1–1224        | 98.3         |
|        | RNA4 | contig_255 | 65443        | 1312      | 168–1483      | 91.6         |
|        | RNA5 | contig_309 | 109523       | 1260      | 11–1274       | 88.9         |
|        | RNA6 | contig_66  | 116627       | 991       | 1–991         | 90.1         |
| AKS-15 | RNA1 | contig_177 | 370602       | 7151      | 13–7159       | 92.4         |
|        | RNA2 | contig_70  | 93402        | 2221      | 1–2221        | 93.7         |
|        | RNA3 | contig_107 | 601278       | 1228      | 1–1228        | 98.0         |
|        | RNA4 | contig_184 | 86128        | 1488      | 2–1488        | 95.8         |
|        | RNA5 | contig_914 | 79172        | 1239      | 2–1239        | 97.9         |
|        | RNA6 | contig_305 | 99406        | 975       | 1–975         | 87.9         |

**Table S4** RT-PCR detection of jujube yellow mottle-associated virus (JYMaV) using the three pair of primers in jujube plants grown in Xinjiang Uygur Autonomous region of China and Shanxi Province

| Origin   | Variety | Sample ID <sup>a</sup> | Tissue <sup>b</sup> | Symptom <sup>c</sup> | RT-PCR <sup>d</sup> |      |      |
|----------|---------|------------------------|---------------------|----------------------|---------------------|------|------|
|          |         |                        |                     |                      | RNA3                | RNA5 | RNA6 |
| Xinjiang | Huizao  | AKS-1                  | L                   | CRS                  | +                   | +    | +    |
|          |         | AKS-3                  | L                   | CRS                  | -                   | -    | -    |
|          |         | AKS-5                  | L                   | B, CS                | +                   | +    | +    |
|          |         | AKS-9                  | L                   | M, MF                | +                   | +    | +    |
|          |         | HZ-1                   | L                   | CRS, MF, B           | +                   | +    | +    |
|          |         | XHL-17                 | L                   | CS, MF, M            | +                   | +    | +    |
|          |         | XHL-18                 | L                   | CS, MF, M            | +                   | +    | +    |
|          |         | XHL-19                 | L                   | CS, MF, M            | +                   | +    | +    |
|          |         | XHL-20                 | L                   | CS, MF, M            | +                   | +    | +    |
|          |         | YGQ3-1                 | L                   | CS, MF, M            | +                   | +    | +    |
|          |         | YGQ3-2                 | L                   | CS, MF, M            | +                   | +    | +    |
|          |         | YGQ3-3                 | L                   | CS, MF, M            | +                   | +    | +    |
|          |         | YGQ3-4                 | L                   | CS, MF, M            | -                   | -    | -    |
|          |         | YGQ3-5                 | L                   | CS, MF, M            | +                   | +    | +    |
|          |         | YGQ3-6                 | L                   | CS, MF, M            | +                   | +    | +    |
|          |         | YGQ3-7                 | L                   | CS, MF, M            | +                   | +    | +    |
|          |         | YGQ3-8                 | L                   | CS, MF, M            | +                   | +    | +    |
|          |         | YGQ3-9                 | L                   | CS, MF, M            | +                   | +    | +    |
|          |         | YGQ3-10                | L                   | CS, MF, M            | +                   | +    | +    |
|          |         | YGQ3-11                | L                   | CS, MF, M            | +                   | +    | +    |
|          |         | YGQ3-12                | L                   | CS, MF, M            | +                   | +    | +    |
|          |         | YGQ3-13                | L                   | CS, MF, M            | +                   | +    | +    |
|          |         | YGQ3-14                | L                   | CS, MF, M            | +                   | +    | +    |
|          |         | YGQ3-15                | L                   | CS, MF, M            | +                   | +    | +    |
|          |         | YGQ2-7                 | L                   | CS, MF, M            | +                   | +    | +    |
|          |         | YGQ2-8                 | L                   | CS, MF, M            | +                   | +    | +    |
|          |         | KEL-1                  | L                   | N                    | -                   | -    | -    |
|          |         | AKS-8                  | L                   | B, CS                | +                   | +    | +    |
|          |         | AKS-10                 | L                   | N                    | -                   | -    | -    |
|          |         | AKS-11                 | L                   | N                    | -                   | -    | -    |
|          |         | AKS-12                 | L                   | CS, B                | +                   | -    | -    |
|          |         | AKS-14                 | L                   | CS, B                | +                   | +    | +    |
|          |         | AKS-15                 | L                   | CS, MF               | +                   | +    | +    |
|          |         | AKS-16                 | L                   | CS, B                | +                   | +    | +    |
| AKS-17   | L       | CS, B                  | +                   | +                    | +                   |      |      |
| AKS-18   | L       | M, B                   | +                   | +                    | +                   |      |      |

|        |                  |        |   |           |   |   |   |
|--------|------------------|--------|---|-----------|---|---|---|
|        |                  | AKS-19 | L | CS, B     | + | + | + |
|        |                  | AKS-20 | L | M, B      | + | + | + |
|        |                  | XHL-1  | L | CS, MF, M | + | + | + |
|        |                  | XHL-2  | L | CS, MF, M | + | + | + |
|        |                  | XHL-3  | L | CS, MF, M | - | + | + |
|        |                  | XHL-4  | L | CS, MF, M | + | + | + |
|        |                  | XHL-5  | L | CS, MF, M | + | + | - |
|        |                  | XHL-10 | L | CS, MF, M | + | + | + |
|        |                  | YGQ2-1 | L | CS, MF, M | + | + | - |
|        |                  | YGQ2-2 | L | CS, MF, M | - | - | - |
|        |                  | YGQ2-3 | L | CS, MF, M | + | + | + |
|        |                  | YGQ2-4 | L | CS, MF, M | + | + | + |
|        |                  | YGQ2-5 | L | CS, MF, M | + | + | + |
|        |                  | YGQ2-6 | L | CS, MF, M | + | + | + |
|        |                  | KEL-2  | L | N         | - | - | - |
|        | <i>Z. jujube</i> | AKS-2  | L | CRS       | + | + | + |
|        | var. spinosa     | AKS-4  | L | CRS       | + | + | + |
|        |                  | AKS-6  | L | CRS       | + | + | + |
|        |                  | XHL-6  | L | CS, MF, M | + | + | + |
|        |                  | XHL-7  | L | CS, MF, M | + | + | + |
|        |                  | XHL-8  | L | CS, MF, M | - | - | - |
|        |                  | XHL-9  | L | CS, MF, M | - | + | - |
|        |                  | AYKL-1 | L | CS, MF, M | + | + | + |
|        |                  | AYKL-2 | L | CS, MF, M | + | + | + |
|        |                  | AYKL-3 | L | CS, MF, M | + | + | + |
|        |                  | AYKL-4 | L | CS, MF, M | + | + | + |
|        |                  | AYKL-5 | L | CS, MF, M | + | + | + |
|        | Jixinzao         | AKS-7  | L | B, MF, CS | + | + | + |
|        | Unknow           | WS-1   | L | N         | - | - | - |
|        |                  | WS-2   | L | N         | - | - | - |
|        |                  | WS-3   | L | N         | - | - | - |
|        |                  | WS-4   | L | N         | - | - | - |
|        |                  | WS-5   | L | N         | - | - | - |
|        |                  | WS-6   | L | N         | - | - | - |
|        |                  | WS-7   | L | N         | - | - | - |
|        |                  | WS-8   | L | N         | - | - | - |
|        |                  | WS-9   | L | N         | - | - | - |
|        |                  | WS-10  | L | N         | - | - | - |
|        | Dongzao          | AKS-13 | L | CRS       | + | + | + |
| Shanxi | Hupingzao        | SX-1   | L | N         | - | - | - |
|        |                  | SX-2   | L | N         | - | - | - |
|        |                  | SX-3   | L | N         | - | - | - |

|       |   |   |    |    |    |
|-------|---|---|----|----|----|
| SX-4  | L | N | -  | -  | -  |
| SX-5  | L | N | -  | -  | -  |
| SX-6  | L | N | -  | -  | -  |
| SX-7  | L | N | -  | -  | -  |
| SX-8  | L | N | -  | -  | -  |
| SX-9  | L | N | -  | -  | -  |
| SX-10 | L | N | -  | -  | -  |
| Total |   |   | 55 | 56 | 53 |

a: samples were collected from five different locations in Xinjiang Uygur Autonomous region of China as indicated by the first letters (AKS, XHL, YGQ3, YGQ2, and AYKL) in the sample names.

b: L, leaf

d: M, mosaic; B, blotch; MF, malformation; CS, chlorotic spot; CRS, chlorotic ringspot; N, symptom unknown.

d: +, positive; -, negative; N, not tested.
